# Supplementary material for: Identification and Functional Analysis of a Novel CTNNB1 Mutation in Pediatric Medulloblastoma
Source: MDPI journal article supplement (doi:10.3390/cancers14020421), 2022-01-14
Supplement: s1 [file Supplementary Figures S1,S2.pdf › Supplementary Figures S1,S2.pdf]

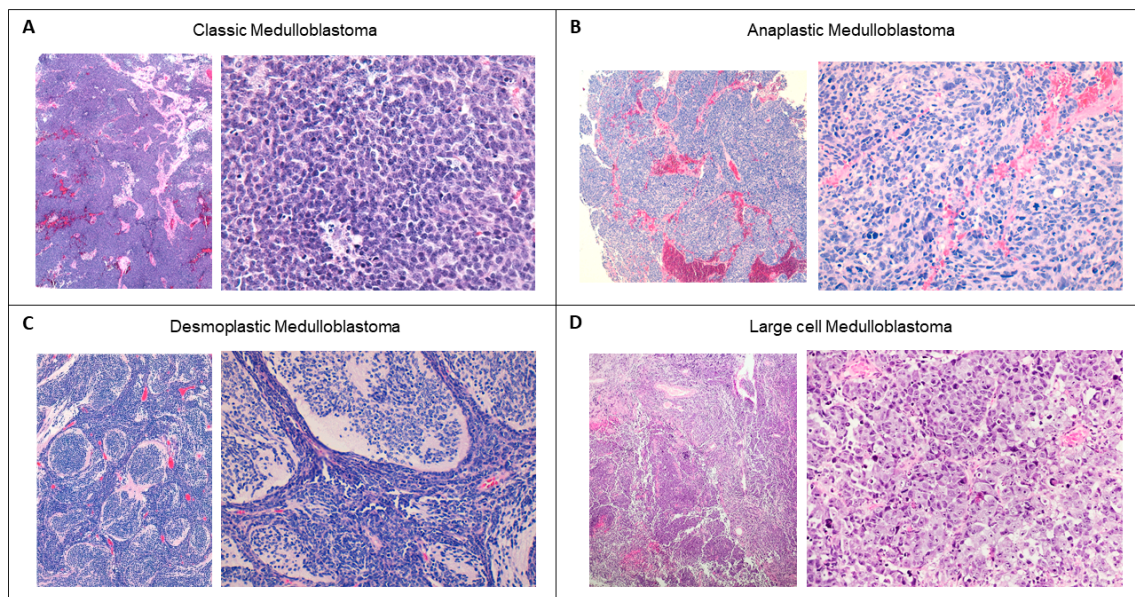

**Supplementary Figure S1:** Histologically defined entities of our medulloblastoma (MB) cohort. **Fig S1A:** Classic MB (Hematoxylin-eosin stain, left:40x magnification, right:400x magnification). **Fig S1B:** Anaplastic MB (Hematoxylin-eosin stain, left:100x magnification, right:400x magnification). **Fig S1C:** Desmoplastic MB (Hematoxylin-eosin stain, left:100x magnification, right:200x magnification). **Fig S1D:** Large Cell MB (Hematoxylin-eosin stain, left:40x magnification, right:400x magnification).

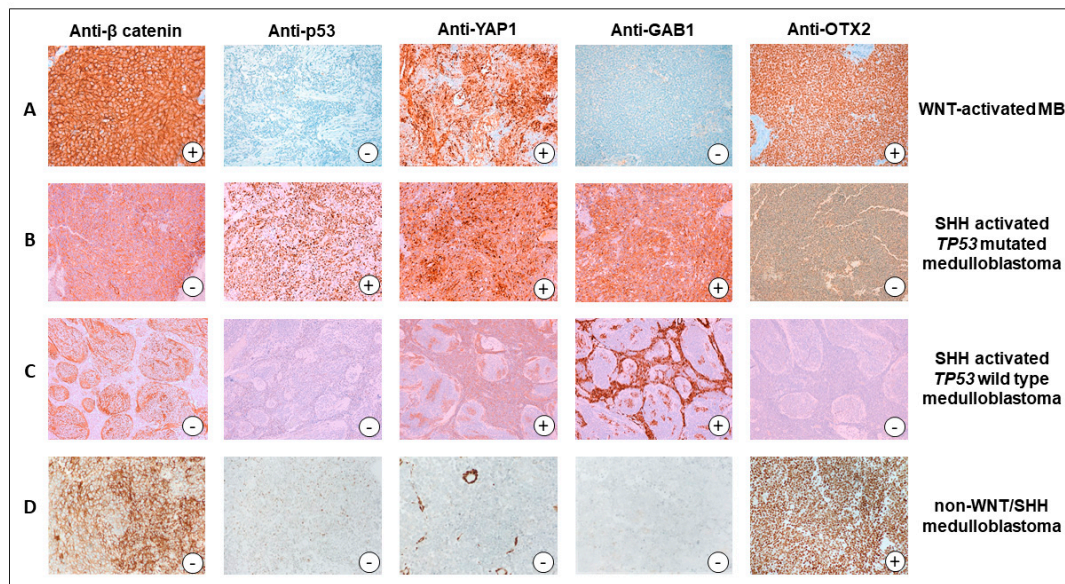

**Supplementary Figure S2:** Characteristic immunophenotype of the different molecular subgroups in our medulloblastoma (MB) cohort. **Fig S2A:** WNT-activated MB (200x magnification). **Fig S2B:** SHH-activated TP53 mutated MB (200x magnification). **Fig S2C:** SHH-activated TP53 wild type MB (100x magnification). **Fig S2D:** Non-WNT/SHH MB (200x magnification).
