# Supplementary material for: Identification and Functional Analysis of a Novel CTNNB1 Mutation in Pediatric Medulloblastoma
Source: MDPI journal article supplement (doi:10.3390/cancers14020421), 2022-01-14
Supplement: s1 [file Supplementary Table S1.xlsx]

## Sheet: Hoja1
Nº of patient	β-catenin nuclear expression + CTNNB1 mutation	p53 nuclear expression + TP53 mutation	GAB1	YAP1	OTX2	MYC	NMYC	MONOSOMY 6	DIAGNOSIS
MB1	Negative	Negative	Negative	Negative		Amplified	Non amplified	Absence	MB Anaplastic, non WNT/SHH
MB2	Negative	Negative	Negative	Negative		Non amplified	Non amplified	Absence	MB Anaplastic, non WNT/SHH
MB3	Positive c.95A>G(p.Asp32Gly)	Negative	Negative	Positive		Non amplified	Non amplified	Presence	MB Classic, WNT-activated
MB4	Negative	Negative	Positive	Positive		Non amplified	Non amplified	Absence	MB Desmoplastic, SHH TP53 wt
MB5	Positive c.98C>A (p.Ser33Tyr)	Negative	Negative	Positive		Non amplified	Non amplified	Presence	MB Classic, WNT-activated
MB6	Negative	Negative	Positive	Positive		Non amplified	Non amplified	Absence	MB Desmoplastic, SHH TP53 wt
MB7	Negative	Negative	Negative	Negative		Non amplified	Amplified	Absence	MB Classic, non WNT/SHH
MB8	Negative	Negative	Negative	Negative		Non amplified	Non amplified	Absence	MB Classic, non WNT/SHH
MB9	Negative	Negative	Negative	Negative		Amplified	Non amplified	Absence	MB Anaplastic, non WNT/SHH
MB10	Negative	Negative	Negative	Negative		Non amplified	Non amplified	Absence	MB Classic, non WNT/SHH
MB11	Negative	Negative	Negative	Negative		Non amplified	Non amplified	Absence	MB Classic, non WNT/SHH
MB12	Negative	Negative	Negative	Negative		Non amplified	Non amplified	Absence	MB Classic, non WNT/SHH
MB13	Negative	Negative	Negative	Negative		Non amplified	Non amplified	Absence	MB Classic, non WNT/SHH
MB14	Negative	Negative	Negative	Negative		Non amplified	Non amplified	Absence	MB Classic, non WNT/SHH
MB15	Negative	Negative	Negative	Negative		Non amplified	Non amplified	Absence	MB Classic, non WNT/SHH
MB16	Negative	Negative	Negative	Negative		Non amplified	Non amplified	Absence	MB Classic, non WNT/SHH
MB17	Negative	Negative	Negative	Negative		Non amplified	Non amplified	Absence	MB Classic, non WNT/SHH
MB18	Negative	Negative	Negative	Positive		Non amplified	Non amplified	Absence	MB Anaplastic, non WNT/SHH
MB19	Negative	Negative	Negative	Negative		Non amplified	Non amplified	Absence	MB Classic, non WNT/SHH
MB20	Negative	Negative	Negative	Negative		Non amplified	Non amplified	Absence	MB Classic, non WNT/SHH
MB21	Negative	Negative	Negative	Negative		Amplified	Non amplified	Absence	MB Anaplastic, non WNT/SHH
MB22	Negative	Negative	Negative	Negative		Non amplified	Non amplified	Absence	MB Classic, non WNT/SHH
MB23	Negative	Negative	Negative	Negative		Non amplified	Amplified		MB Classic, non WNT/SHH
MB24	Negative	Negative	Negative	Negative		Non amplified	Non amplified		MB Anaplastic, non WNT/SHH
MB25	Negative	Positive	Positive	Positive		Non amplified	Amplified		MB Anaplastic, SHH TP53 mut
MB26	Negative	Negative	Negative	Negative		Non amplified	Non amplified	Presence	MB Anaplastic, non WNT/SHH
MB27	Positive c.98C>G (p.Ser33Cys)	Negative	Negative	Positive		Non amplified	Non amplified	Presence	MB Classic, WNT-activated
MB28	Positive p.Ser37del	Negative	Negative	Positive		Non amplified	Non amplified	Presence	MB Classic, WNT-activated
MB29	Negative	Negative	Negative	Negative		Non amplified	Non amplified	Absence	MB Classic, non WNT/SHH
MB30	Negative	Negative	Negative	Positive		Non amplified	Non amplified	Absence	MB Classic, non WNT/SHH
MB31	Negative	Negative	Negative	Negative		Non amplified	Non amplified	Absence	MB Classic, non WNT/SHH
MB32	Negative	Negative	Positive	Positive		Non amplified	Non amplified	Absence	MB Desmoplastic, SHH TP53 wt
MB33	Negative	Negative	Negative	Negative		Non amplified	Non amplified	Absence	MB Classic, non WNT/SHH
MB34	Negative	Negative	Positive	Positive	Negative	Non amplified	Non amplified		MB Desmoplastic, SHH TP53 wt
MB35	Negative	Negative	Negative	Negative	Positive	Non amplified	Non amplified	Absence	MB Classic, non WNT/SHH
MB36	Negative	Negative	Negative	Negative	Positive	Non amplified	Non amplified	Absence	MB Classic, non WNT/SHH
MB37	Negative	Negative	Negative	Negative	Positive	Non amplified	Non amplified	Absence	MB Classic, non WNT/SHH
MB38	Positive c.98C>T p.Ser33Phe	Negative	Negative	Positive	Positive	Non amplified	Non amplified	Presence	MB Classic, WNT-activated
MB39	Negative	Negative	Negative	Negative	Positive	Non amplified	Non amplified	Absence	MB Classic, non WNT/SHH
MB40	Negative	Negative	Negative	Negative	Positive	Non amplified	Non amplified	Absence	MB Anaplastic, non WNT/SHH
MB41	Negative	Negative	Positive	Positive	Negative	Non amplified	Non amplified	Absence	MB Classic , SHH TP53 wt
MB42	Negative	Negative	Negative	Negative	Negative	Non amplified	Non amplified	Absence	MB Classic, non WNT/SHH
MB43	Negative	Negative	Negative	Negative	Positive	Non amplified	Non amplified	Absence	MB Classic, non WNT/SHH
MB44	Negative	Negative	Negative	Negative	Positive	Non amplified	Non amplified	Absence	MB Classic, non WNT/SHH
MB45	Positive c.94G>T (p.Asp32Tyr)	Negative	Negative	Positive	Positive	Non amplified	Non amplified	Presence	MB LCA, WNT-activated
MB46	Negative	Negative	Negative	Negative	Negative	Non amplified	Non amplified	Absence	MB Classic, non WNT/SHH
MB47	Negative	Negative	Positive	Positive					MB Classic , SHH TP53 wt
MB48	Negative	Negative	Positive	Positive	Negative	Non amplified	Non amplified	Absence	MB Desmoplastic, SHH TP53 wt
MB49	Negative	Negative	Negative	Negative		Non amplified	Non amplified	Absence	MB Classic, non WNT/SHH
MB50	Negative	Negative	Negative	Negative		Non amplified	Non amplified	Absence	MB Classic, non WNT/SHH
MB51	Negative	Negative	Negative	Negative	Positive	Non amplified	Non amplified	Absence	MB Anaplastic, non WNT/SHH
MB52	Negative	Negative	Negative	Negative	Positive	Non amplified	Non amplified	Absence	MB Classic, non WNT/SHH
MB53	Negative	Negative	Negative	Negative	Positive	Non amplified	Non amplified	Absence	MB Classic, non WNT/SHH
MB54	Negative	Negative	Negative	Negative	Positive	Non amplified	Amplified	Absence	MB Classic, non WNT/SHH (probably Gr.4)
MB55	Negative	Negative	Negative	Negative	Positive	Non amplified	Non amplified	Absence	MB Classic, non WNT/SHH
MB56	Negative	Negative	Negative	Negative	Positive	Amplified	Non amplified	Absence	MB Classic, non WNT/SHH (probably Gr.3)
MB57	Negative	Negative	Negative	Negative	Positive	Non amplified	Non amplified	Absence	MB Classic, non WNT/SHH
MB58	Negative	Negative	Negative	Negative	Positive	Non amplified	Non amplified	Absence	MB Classic, non WNT/SHH
MB59	Negative	Negative	Negative	Negative	Positive	Non amplified	Non amplified	Absence	MB Classic, non WNT/SHH
MB60	Negative	Negative	Positive	Positive	Negative	Non amplified	Non amplified	Absence	MB Desmoplastic, SHH TP53 wt
MB61	Negative	Negative	Positive	Positive	Negative	Non amplified	Non amplified		MB Desmoplastic, SHH TP53 wt
MB62	Negative	Negative	Negative	Negative	Positive	Non amplified	Non amplified	Absence	MB Classic, non WNT/SHH
MB63	Negative	Negative	Negative	Negative	Positive	Non amplified	Non amplified	Absence	MB Classic, non WNT/SHH
MB64	Negative	Negative	Negative	Negative	Positive	Non amplified	Non amplified	Absence	MB Classic, non WNT/SHH
MB65	Negative	Negative	Positive	Positive		Non amplified	Non amplified	Absence	MB Desmoplastic, SHH TP53 wt
MB66	Negative	Negative	Negative	Negative	Positive	Non amplified	Amplified	Absence	MB Anaplastic, non WNT/SHH (TP53 mut)
MB67	Negative	Negative	Negative	Negative	Positive	Non amplified	Non amplified	Absence	MB Classic, non WNT/SHH
MB68	Negative	Negative	Positive	Positive	Negative	Non amplified	Non amplified	Absence	MB Desmoplastic, SHH TP53 wt
MB69	Negative	Negative	Positive	Positive	Negative	Non amplified	Non amplified	Absence	MB Desmoplastic, SHH TP53 wt
MB70	Negative	Negative	Negative	Negative	Positive	Amplified	Non amplified	Absence	MB LCA, non WNT/SHH (probably Gr.3)
MB71	Negative	Negative	Positive	Positive	Negative	Non amplified	Non amplified	Absence	MB Desmoplastic, SHH TP53 wt
MB72	Negative	Negative	Negative	Negative	Positive	Non amplified	Non amplified	Absence	MB Classic, non WNT/SHH
MB73	Negative	Positive c.74+59G>A (VUS)	Negative	Positive	Negative	Non amplified	Non amplified	Absence	MB Anaplastic, SHH TP53 mut
MB74	Positive c.100G>A (p.Gly34Arg)	Focal expression c. 215 C>G, p.Pro72Arg	Negative	Positive	Positive	Non amplified	Non amplified	positividad parcheada	MB Classic, WNT-activated
MB75	Positive c.98C>A (p.Ser33Tyr)	Negative	Negative	Positive	Positive	Non amplified	Non amplified	Absence	MB Classic, WNT-activated
MB76	Negative	Negative	Negative	Negative	Positive	Non amplified	Non amplified	Absence	MB Classic, non WNT/SHH
MB77	Negative	Negative	Positive	Positive	Negative	Non amplified	Non amplified	Absence	MB Desmoplastic, SHH TP53 wt
MB78	Negative	Negative	Negative	Negative	Positive	Non amplified	Amplified	Absence	MB Classic, non WNT/SHH (probably Gr.4)
MB79	Negative	Negative	Negative	Negative	Positive	Non amplified	Non amplified	Absence	MB Classic, non WNT/SHH
MB80	Negative	Negative	Negative	Negative	Positive	Non amplified	Non amplified	Absence	MB Classic, non WNT/SHH
MB81	Negative	Negative	Negative	Negative	Positive	Non amplified		Absence	MB Classic, non WNT/SHH
MB82	Negative	Negative	Negative	Negative	Positive	Non amplified	Non amplified	Absence	MB Classic, non WNT/SHH
MB83	Negative	Negative	Negative	Negative	Positive	Non amplified	Non amplified	Absence	MB Classic, non WNT/SHH
MB84	Negative	Negative	Positive	Positive	Negative	Non amplified	Non amplified	Absence	MB Desmoplastic, SHH TP53 wt
MB85	Positive c.98C>T (p.Ser33Phe)	Positive c. 345_357del (p.H115Qfs*4)	Negative	Positive	Positive	Non amplified	Non amplified	Absence	MB Classic, WNT-activated
MB86	Negative	Negative	Negative	Negative	Positive	Non amplified	Amplified	Absence	MB Anaplastic, non WNT/SHH
MB87	Negative	Negative	Negative	Negative	Positive	Non amplified	Non amplified	Absence	MB Classic, non WNT/SHH
MB88	Negative	Negative	Negative	Negative	Positive	Non amplified	Non amplified	Absence	MB Classic, non WNT/SHH
		WNT-activated medulloblastomas
